# Supplementary material
Source: PubMed Central journal article supplement (PMC7198118)
Supplement: BJOG-2019-1471-0528-15903-s2.pdf [file BJOG-2019-1471-0528-15903-s2.pdf]

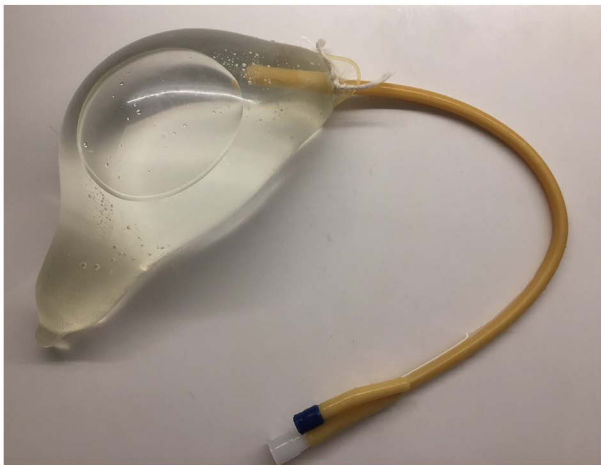

**Figure S1.** Example of a completed condom-catheter UBT system used in the trial.
