# Supplementary material
Source: PubMed Central journal article supplement (PMC7198118)
Supplement: BJOG-2019-1471-0528-15903-s3.pdf [file BJOG-2019-1471-0528-15903-s3.pdf]

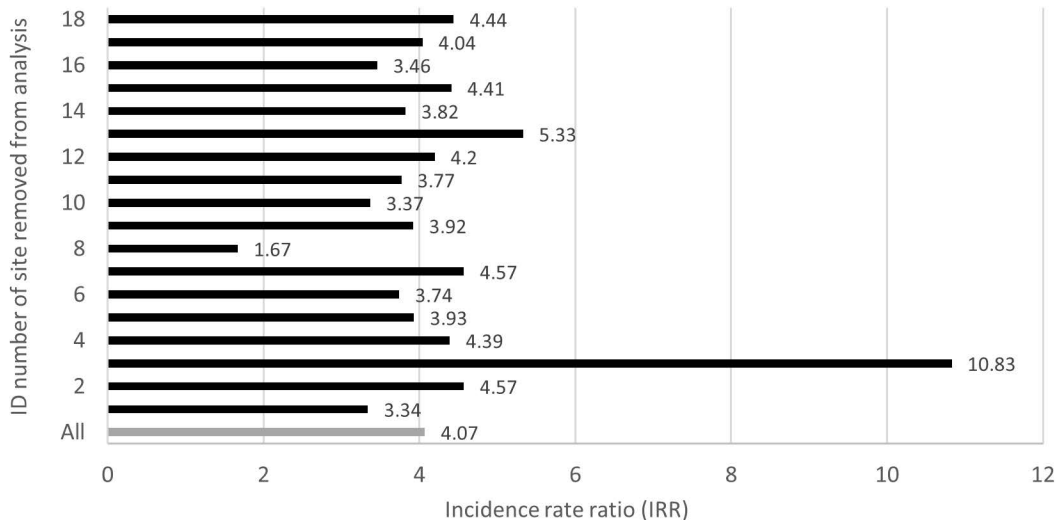

**Figure S2.** Sensitivity analysis by site: estimated incident rate ratios (IRRs) after excluding each site from mixed effects Poisson regression models. Site 3 and Site 8 were identified as outlier sites and excluded in a sensitivity analysis of primary and secondary outcomes (see Table S1).
